# Supplementary material for: Effect of Nanoparticles Exposure on Fractional Exhaled Nitric Oxide (FENO) in Workers Exposed to Nanomaterials
Source: PubMed Central journal article supplement (PMC3907844; doi:10.3390/ijms15010878), 2014-01-09
Supplement: ijms-15-00878-s001.pdf [file ijms-15-00878-s001.pdf]

## Supplementary Information

**Table S1.** The basic hygiene information of 13 factories participated in this study.

| Factory number | Industry                | Starting year | Workplace      | Dust control method                       | Handling of Leakage        |
|----------------|-------------------------|---------------|----------------|-------------------------------------------|----------------------------|
| 1              | Photocatalyst mfg       | 2006          | Enclosed       | Local ventilation                         | Sweeping                   |
| 2              | Nanomaterials mfg       | 2004          | Enclosed       | Local ventilation                         | Flushing with water        |
| 3              | Nanomaterials mfg       | 2007          | Open           | Local ventilation                         | Flushing with water        |
| 4              | Toilet mfg              | 2001          | Enclosed       | Local ventilation                         | Flushing with water        |
| 5              | Air cleaner mfg         | 2004          | Open           | Local ventilation and General ventilation | Sweeping                   |
| 6              | Toilet mfg              | 2007          | Enclosed       | Local ventilation and General ventilation | Flushing with water        |
| 7              | LED mfg                 | 2004          | Open with hood | Local ventilation and General ventilation | Sweeping                   |
| 8              | LED mfg                 | 2002          | Enclosed       | Local ventilation and General ventilation | Flushing with water        |
| 9              | Paint mfg               | 2001          | Open           | Local ventilation and General ventilation | Sweeping                   |
| 10             | Colorants mfg           | 2003          | Enclosed       | Local ventilation                         | Sweeping                   |
| 11             | Carbon nanotube mfg     | 2004          | Open           | Local ventilation                         | Vacuum cleaner or sweeping |
| 12             | Textile mfg             | 2006          | Enclosed       | Local ventilation                         | Sweeping                   |
| 13             | Self-cleaning tiles mfg | 2008          | Open           | General ventilation                       | Flushing with water        |

Abbreviation: mfg: manufacturing; LED: light emission device.

**Table S2.** The characteristics of nanomaterials used or manufactured in these 13 factories.

| Factory number | Type of nanomaterial handling | Nanomaterial used/Mfd          | Major nanomaterial used/Mfd    | Size (nm)         | Amount used/Mfd (mg/Time) | Duration of use/Mfg (Hour/Time) | Frequency of use/Mfg (Times/Week) | Type of nanomaterials used/Mfd   |
|----------------|-------------------------------|--------------------------------|--------------------------------|-------------------|---------------------------|---------------------------------|-----------------------------------|----------------------------------|
| 1              | Use                           | Nano-silver                    | Nano-silver                    | Unknown           | 20                        | 5                               | 5                                 | Liquid solution                  |
| 2              | Use                           | Fe <sub>2</sub> O <sub>3</sub> | Fe <sub>2</sub> O <sub>3</sub> | 6–10              | 5000                      | 2                               | 1                                 | Liquid solution                  |
|                |                               | Nano-gold                      |                                | 3–40              | 19                        | 0.1                             | 1                                 | Liquid solution                  |
|                |                               | Nano-silver                    |                                | 5–10              | 2.1                       | 0.1                             | 1                                 | Liquid solution                  |
|                | Mfg                           | Fe <sub>2</sub> O <sub>3</sub> | Fe <sub>2</sub> O <sub>3</sub> | 6–10              | 5000                      | 0.2                             | 8                                 | Liquid solution                  |
|                |                               | Nano-gold                      |                                | 3–40              | 10                        | 0.25                            | 8                                 | Liquid solution                  |
|                |                               | Nano-silver                    |                                | 5–10              | 21                        | 0.1                             | 8                                 | Liquid solution                  |
| 3              | Use                           | Titanium dioxide               | Titanium dioxide               | 15–20             | 10,000                    | 2.5                             | 2.5                               | Powder and liquid solution       |
|                | Mfg                           | Titanium dioxide               | Titanium dioxide               | 15–20             | 1,000,000                 | 1                               | 8                                 | Powder and liquid solution       |
| 4              | Use                           | Nano-silver                    | Nano-silver                    | Commercial secret | Commercial secret         | 3                               | 7                                 | Liquid solution                  |
|                | Mfg                           | Nano-silver                    | Nano-silver                    | Commercial secret | Commercial secret         | 7                               | 3                                 | Liquid solution                  |
| 5              | Use                           | Titanium dioxide               | Titanium dioxide               | 20                | 50,000                    | 4                               | 1                                 | Liquid solution                  |
| 6              | Use                           | Silicon dioxide                | Silicon dioxide                | 10                | 50,000                    | 1                               | 1                                 | Liquid solution                  |
|                |                               | Nano-silver                    |                                | 100               | 50                        | 1                               | 1                                 | Liquid solution                  |
| 7              | Use                           | Carbon nanotube                | Carbon nanotube                | 40                | 100                       | 1                               | 1                                 | Powder and liquid solution       |
|                |                               | Silicon dioxide                | Silicon dioxide                | 100               | 50,000                    | 1                               | 1                                 | Powder                           |
| 8              | Use                           | Carbon nanotube                | Carbon nanotube                | 0.5               | Commercial secret         | Commercial secret               | Commercial secret                 | Liquid solution                  |
| 9              | Use                           | Silicon dioxide                | Silicon dioxide                | 12–17             | 300                       | 0.2                             | 4                                 | Powder                           |
| 10             | Mfg                           | Silicon dioxide                |                                | 160               | 2500                      | 5                               | 1                                 | Liquid solution                  |
|                |                               | Silicon dioxide                | Silicon dioxide                | 100–200           | 60,000                    | 5                               | 8                                 | Colloid                          |
| 11             | Use                           | Carbon nanotube                | Carbon nanotube                | 110               | 5000                      | 0.5                             | 4.5                               | Powder, liquid solution, and gel |
|                | Mfg                           | Carbon nanotube                | Carbon nanotube                | 110               | 4,000,000                 | 4                               | 12                                | Powder and liquid solution       |
| 12             | Use                           | Carbon nanotube                | Carbon nanotube                | 100               | >20                       | 1                               | 3.5                               | Powder                           |
|                |                               | Nano-silver                    |                                | >100              | >40                       | 1                               | 3.5                               | Liquid solution                  |
| 13             | Use                           | Titanium dioxide               | Titanium dioxide               | Unknown           | 5                         | 6                               | 0.33                              | Liquid solution                  |

Abbreviation: mfg: manufacturing; mfd: manufactured.

**Table S3.** Information on the duration and frequency of nanomaterials used, personal protective equipment and ventilation system among the nanomaterials exposed group.

|                                                                   | <b>NM exposed group</b> |        |
|-------------------------------------------------------------------|-------------------------|--------|
|                                                                   | <b>(n = 241)</b>        |        |
| Nanomaterials used                                                | Mean                    | (SD)   |
| Frequency of operation (times/week)                               | 2.90                    | (1.92) |
| Duration of operation (hours/time)                                | 3.01                    | (3.26) |
| Years of exposure (year)                                          | 2.96                    | (2.14) |
| Total exposure time (hours)                                       | 1495                    | (3271) |
|                                                                   | <i>n</i>                | (%)    |
| Nanomaterials category                                            |                         |        |
| Carbon nanotube                                                   | 57                      | (23.7) |
| Nano-TiO <sub>2</sub>                                             | 17                      | (7.1)  |
| Nano-SiO <sub>2</sub>                                             | 36                      | (14.9) |
| Nano-Ag                                                           | 16                      | (6.6)  |
| Other nanomaterial exposure (Nano resin, Nan clays, and Nano-Au ) | 54                      | (22.4) |
| Over two types of nanomaterials exposure                          | 61                      | (25.3) |
| Ventilation system                                                |                         |        |
| General ventilation systems                                       | 41                      | (17.0) |
| Local exhaust system                                              | 114                     | (47.3) |
| Industrial fan                                                    | 20                      | (8.3)  |
| Others                                                            | 66                      | (27.4) |
| Protective equipment                                              |                         |        |
| No                                                                | 19                      | (7.9)  |
| Cotton mask                                                       | 16                      | (6.6)  |
| Activated carbon mask                                             | 58                      | (24.1) |
| N95 medical mask                                                  | 9                       | (3.7)  |
| Gas mask                                                          | 15                      | (6.2)  |
| Others                                                            | 124                     | (51.5) |

**Table S4.** Summary of the most important characteristics of probability scores.

| Variables/scores                          | 30 pts | 25 pts  | 22.5 pts | 18.75 pts | 15 pts | 12.5 pts  | 11.25 pts | 10 pts | 7.5 pts | 6.25 pts | 5 pts     | 0 pts             |
|-------------------------------------------|--------|---------|----------|-----------|--------|-----------|-----------|--------|---------|----------|-----------|-------------------|
| Estimated amount of material used         | -      | >100 mg | -        | Unknown   | -      | 11–100 mg | -         | -      | -       | 0–10 mg  | -         | -                 |
| Dustiness/mistiness                       | High   | -       | Unknown  | -         | Medium | -         | -         | -      | Low     | -        | -         | None              |
| Number of employees with similar exposure | -      | -       | -        | -         | >15    | -         | Unknown   | 11–15  | -       | -        | 6–10      | 1–5               |
| Frequency of operation                    | -      | -       | -        | -         | Daily  | -         | -         | Weekly | -       | -        | Monthly   | Less than monthly |
| Duration of operation                     | -      | -       | -        | -         | >4 h   | -         | Unknown   | 1–4 h  | -       | -        | 30–60 min | <30 min           |

**Table S5.** Summary of the most important characteristics of severity factors and scores.

| Variables/scores            | 10 pts                | 7.5 pts | 6 pts | 5 pts                    | 4.5 pts | 4 pts | 3 pts   | 2.5 pts                    | 0 pts             |
|-----------------------------|-----------------------|---------|-------|--------------------------|---------|-------|---------|----------------------------|-------------------|
| Nanomaterial                |                       |         |       |                          |         |       |         |                            |                   |
| Surface chemistry           | High                  | Unknown | -     | Medium                   | -       | -     | -       | -                          | Low               |
| Particle Shape              | Tubular/fibrous       | Unknown | -     | Anisotropic              | -       | -     | -       | -                          | Compact/Spherical |
| Particle Diameter           | 1–10 nm               | Unknown | -     | 11–40 nm                 | -       | -     | -       | -                          | >41 nm            |
| Solubility                  | Insoluble             | Unknown | -     | soluble                  | -       | -     | -       | -                          | -                 |
| Carcinogenicity             | -                     | -       | Yes   | -                        | Unknown | -     | -       | -                          | No                |
| Reproductive Toxicity       | -                     | -       | Yes   | -                        | Unknown | -     | -       | -                          | No                |
| Mutagenicity                | -                     | -       | Yes   | -                        | Unknown | -     | -       | -                          | No                |
| Dermal Toxicity             | -                     | -       | Yes   | -                        | Unknown | -     | -       | -                          | No                |
| Asthmagen                   | -                     | -       | Yes   | -                        | Unknown | -     | -       | -                          | No                |
| Parent Material             |                       |         |       |                          |         |       |         |                            |                   |
| Occupational exposure limit | <10 µg/m <sup>3</sup> | Unknown | -     | 10–100 µg/m <sup>3</sup> | -       | -     | -       | 101–1000 µg/m <sup>3</sup> | -                 |
| Carcinogenicity             | -                     | -       | -     | -                        | -       | Yes   | Unknown | -                          | No                |
| Reproductive Toxicity       | -                     | -       | -     | -                        | -       | Yes   | Unknown | -                          | No                |
| Mutagenicity                | -                     | -       | -     | -                        | -       | Yes   | Unknown | -                          | No                |
| Dermal Toxicity             | -                     | -       | -     | -                        | -       | Yes   | Unknown | -                          | No                |

**Table S6.** The classification of the different NPs in term of Risk levels.

| Variables                          | RL1 ( <i>n</i> = 126) |        | RL2 ( <i>n</i> = 115) |        | <i>p</i> -Value <sup>a</sup> |
|------------------------------------|-----------------------|--------|-----------------------|--------|------------------------------|
|                                    | <i>n</i>              | (%)    | <i>n</i>              | (%)    |                              |
| Carbon nanotube                    | 25                    | (19.8) | 32                    | (27.8) | 0.090                        |
| Nano-TiO <sub>2</sub>              | 9                     | (7.1)  | 8                     | (7.0)  |                              |
| Nano-SiO <sub>2</sub>              | 23                    | (18.3) | 13                    | (11.3) |                              |
| Nano-Ag                            | 10                    | (7.9)  | 6                     | (5.2)  |                              |
| Other NM exposure                  | 34                    | (27.0) | 20                    | (17.4) |                              |
| More than two types of NM exposure | 25                    | (19.8) | 36                    | (31.3) |                              |

<sup>a</sup> Chi-Square Tests.

© 2014 by the authors; licensee MDPI, Basel, Switzerland. This article is an open access article distributed under the terms and conditions of the Creative Commons Attribution license (<http://creativecommons.org/licenses/by/3.0/>).
